# Supplementary material for: High-Density Lipoprotein Subclasses and Noncardiovascular, Noncancer Chronic Inflammatory-Related Events Versus Cardiovascular Events: The Multi-Ethnic Study of Atherosclerosis
Source: PubMed Central journal article supplement — J Am Heart Assoc. 2015 Sep 14;4(9):e002295. doi: 10.1161/JAHA.115.002295 (PMC4599511; doi:10.1161/jaha.115.002295), 2015-09-14
Supplement: jah30004-e002295-sd1.pdf [file jah30004-e002295-sd1.pdf]

# High Density Lipoprotein Subclasses and Non-Cardiovascular, Non-Cancer Chronic Inflammatory-Related Events versus Cardiovascular Events: The Multi-Ethnic Study of Atherosclerosis

Daniel A. Duprez, MD, PhD; James Otvos, PhD; Russell Tracy, PhD; Kenneth Feingold MD; Philip Greenland, MD; Myron D. Gross, PhD; Joao A. C. Lima, MD; Rachel H. Mackey, PhD; James Neaton, PhD; Otto A. Sanchez, MD, PhD; David R. Jacobs Jr, PhD

## SUPPLEMENTAL MATERIAL

**Table S1. Numbers of ICD-10 Codes Mentioned in Any Death That Had Any ICD Qualifying for ChrIRD Death. There Were 131 Unique Codes, Among Which Were 557 Code Occurrences in 319 Deaths.**

| ICD 10 code | Rubric                                                                                 | Number of code occurrences |
|-------------|----------------------------------------------------------------------------------------|----------------------------|
| A04.7       | Other bacterial intestinal infections: Enterocolitis due to Clostridium difficile      | 2                          |
| A04.8       | Other bacterial intestinal infections: Other specified bacterial intestinal infections | 1                          |
| A31.0       | Infection due to other mycobacteria: Pulmonary mycobacterial infection                 | 1                          |
| A41.0       | Other septicemia: Septicemia due to Staphylococcus aureus                              | 1                          |
| A41.2       | Other septicemia: Septicemia due to unspecified staphylococcus                         | 1                          |
| A41.9       | Other septicemia: Septicemia, unspecified                                              | 54                         |
| A48.1       | Other bacterial diseases, not elsewhere classified: Legionnaires' disease              | 1                          |
| A49.0       | Bacterial infection of unspecified site: Staphylococcal infection, unspecified         | 1                          |
| A52.1       | Late syphilis: Symptomatic neurosyphilis                                               | 1                          |
| B16.9       | Acute hepatitis B: Acute hepatitis B without delta-agent and without hepatic coma      | 2                          |
| B17.1       | Other acute viral hepatitis: Acute hepatitis C                                         | 1                          |
| B18.2       | Chronic viral hepatitis: Chronic viral hepatitis C                                     | 5                          |
| B19.9       | Unspecified viral hepatitis: Unspecified viral hepatitis without coma                  | 1                          |

|       |                                                                                                                                     |    |
|-------|-------------------------------------------------------------------------------------------------------------------------------------|----|
| B23.8 | Human immunodeficiency virus [HIV] disease resulting in other conditions: HIV disease resulting in other specified conditions       | 1  |
| B24.  | Unspecified human immunodeficiency virus [HIV] disease                                                                              | 5  |
| B99.  | Other and unspecified infectious diseases                                                                                           | 1  |
| D32.9 | Benign neoplasm of meninges: Meninges, unspecified                                                                                  | 1  |
| D38.1 | Neoplasm of uncertain or unknown behavior of middle ear and respiratory and intrathoracic organs: Trachea, bronchus, and lung       | 1  |
| D43.2 | Neoplasm of uncertain or unknown behavior of brain and central nervous system: Brain, unspecified                                   | 1  |
| D45.  | Polycythemia vera                                                                                                                   | 2  |
| D46.9 | Myelodysplastic syndromes: Myelodysplastic syndrome, unspecified                                                                    | 2  |
| D47.1 | Other neoplasms of uncertain or unknown behavior of lymphoid, hematopoietic, and related tissue: Chronic myeloproliferative disease | 1  |
| D48.1 | Neoplasm of uncertain or unknown behavior of other and unspecified sites: Connective and other soft tissue                          | 1  |
| D51.0 | Vitamin B12 deficiency anemia: Vitamin B12 deficiency anemia due to intrinsic factor deficiency                                     | 1  |
| D64.9 | Other anemias: Anemia, unspecified                                                                                                  | 10 |
| D65.  | Disseminated intravascular coagulation [defibrination syndrome]                                                                     | 1  |
| D70.  | Agranulocytosis                                                                                                                     | 1  |
| D72.8 | Other disorders of white blood cells: Other specified disorders of white blood cells                                                | 1  |
| D73.1 | Diseases of spleen: Hypersplenism                                                                                                   | 2  |
| D76.2 | Certain diseases involving lymphoreticular tissue and reticulohistiocytic system: Hemophagocytic syndrome, infection-associated     | 1  |
| D86.9 | Sarcoidosis: Sarcoidosis, unspecified                                                                                               | 1  |
| E03.9 | Other hypothyroidism: Hypothyroidism, unspecified                                                                                   | 6  |
| E27.1 | Other disorders of adrenal gland: Primary adrenocortical insufficiency                                                              | 1  |
| E27.4 | Other disorders of adrenal gland: Other and unspecified adrenocortical insufficiency                                                | 1  |
| E41.  | Nutritional marasmus                                                                                                                | 1  |
| E85.9 | Amyloidosis: Amyloidosis, unspecified                                                                                               | 2  |
| G20.  | Parkinson's disease                                                                                                                 | 10 |
| G30.0 | Alzheimer's disease: Alzheimer's disease with early onset                                                                           | 1  |
| G30.9 | Alzheimer's disease: Alzheimer's disease, unspecified                                                                               | 16 |

|       |                                                                                                                                  |    |
|-------|----------------------------------------------------------------------------------------------------------------------------------|----|
| G31.8 | Other degenerative diseases of nervous system, not elsewhere classified: Other specified degenerative diseases of nervous system | 1  |
| G47.3 | Sleep disorders: Sleep apnea                                                                                                     | 2  |
| G62.8 | Other polyneuropathies: Other specified polyneuropathies                                                                         | 2  |
| G62.9 | Other polyneuropathies: Polyneuropathy, unspecified                                                                              | 1  |
| G70.0 | Myasthenia gravis and other myoneural disorders: Myasthenia gravis                                                               | 1  |
| G93.4 | Other disorders of brain: Encephalopathy, unspecified                                                                            | 1  |
| J06.9 | Acute upper respiratory infections of multiple and unspecified sites: Acute upper respiratory infection, unspecified             | 1  |
| J15.1 | Bacterial pneumonia, not elsewhere classified: Pneumonia due to Pseudomonas                                                      | 1  |
| J18.0 | Pneumonia, organism unspecified: Bronchopneumonia, unspecified                                                                   | 1  |
| J18.1 | Pneumonia, organism unspecified: Lobar pneumonia, unspecified                                                                    | 3  |
| J18.9 | Pneumonia, organism unspecified: Pneumonia, unspecified                                                                          | 50 |
| J20.9 | Acute bronchitis: Acute bronchitis, unspecified                                                                                  | 1  |
| J40.  | Bronchitis, not specified as acute or chronic                                                                                    | 1  |
| J42.  | Unspecified chronic bronchitis                                                                                                   | 1  |
| J43.9 | Emphysema: Emphysema, unspecified                                                                                                | 8  |
| J44.0 | Other chronic obstructive pulmonary disease: Chronic obstructive pulmonary disease with acute lower respiratory infection        | 3  |
| J44.9 | Other chronic obstructive pulmonary disease: Chronic obstructive pulmonary disease, unspecified                                  | 41 |
| J45.9 | Asthma: Asthma, unspecified                                                                                                      | 9  |
| J47.  | Bronchiectasis                                                                                                                   | 1  |
| J61.  | Pneumoconiosis due to asbestos and other mineral fibers                                                                          | 3  |
| J62.8 | Pneumoconiosis due to dust containing silica: Pneumoconiosis due to other dust containing silica                                 | 1  |
| J69.0 | Pneumonitis due to solids and liquids: Pneumonitis due to food and vomit                                                         | 6  |
| J80.  | Adult respiratory distress syndrome                                                                                              | 1  |
| J84.1 | Other interstitial pulmonary diseases: Other interstitial pulmonary diseases with fibrosis                                       | 17 |
| J90.  | Pleural effusion, not elsewhere classified                                                                                       | 3  |
| J96.0 | Respiratory failure, not elsewhere classified: Acute respiratory failure                                                         | 4  |
| J96.1 | Respiratory failure, not elsewhere classified: Chronic respiratory failure                                                       | 2  |

|       |                                                                                                    |    |
|-------|----------------------------------------------------------------------------------------------------|----|
| J96.9 | Respiratory failure, not elsewhere classified: Respiratory failure, unspecified                    | 38 |
| J98.4 | Other respiratory disorders: Other disorders of lung                                               | 2  |
| K25.9 | Gastric ulcer: Unspecified as acute or chronic, without hemorrhage or perforation                  | 1  |
| K27.9 | Peptic ulcer, site unspecified: Unspecified as acute or chronic, without hemorrhage or perforation | 1  |
| K55.9 | Vascular disorders of intestine: Vascular disorder of intestine, unspecified                       | 10 |
| K56.7 | Paralytic ileus and intestinal obstruction without hernia: Ileus, unspecified                      | 1  |
| K59.3 | Other functional intestinal disorders: Megacolon, not elsewhere classified                         | 1  |
| K63.1 | Other diseases of intestine: Perforation of intestine (nontraumatic)                               | 2  |
| K65.9 | Peritonitis: Peritonitis, unspecified                                                              | 2  |
| K70.3 | Alcoholic liver disease: Alcoholic cirrhosis of liver                                              | 1  |
| K70.9 | Alcoholic liver disease: Alcoholic liver disease, unspecified                                      | 1  |
| K72.9 | Hepatic failure, not elsewhere classified: Hepatic failure, unspecified                            | 4  |
| K74.6 | Fibrosis and cirrhosis of liver: Other and unspecified cirrhosis of liver                          | 11 |
| K75.4 | Other inflammatory liver diseases: Autoimmune hepatitis                                            | 1  |
| K75.9 | Other inflammatory liver diseases: Inflammatory liver disease, unspecified                         | 2  |
| K76.0 | Other diseases of liver: Fatty (change of) liver, not elsewhere classified                         | 1  |
| K76.7 | Other diseases of liver: Hepatorenal syndrome                                                      | 1  |
| K81.0 | Cholecystitis: Acute cholecystitis                                                                 | 1  |
| K82.2 | Other diseases of gallbladder: Perforation of gallbladder                                          | 1  |
| K86.9 | Other diseases of pancreas: Disease of pancreas, unspecified                                       | 2  |
| L03.9 | Cellulitis: Cellulitis, unspecified                                                                | 1  |
| L04.9 | Acute lymphadenitis: Acute lymphadenitis, unspecified                                              | 1  |
| L93.0 | Lupus erythematosus: Discoid lupus erythematosus                                                   | 1  |
| M00.9 | Pyogenic arthritis: Pyogenic arthritis, unspecified                                                | 1  |
| M06.9 | Other rheumatoid arthritis: Rheumatoid arthritis, unspecified                                      | 4  |
| M10.9 | Gout: Gout, unspecified                                                                            | 1  |
| M13.9 | Other arthritis: Arthritis, unspecified                                                            | 1  |
| M19.9 | Other arthrosis: Arthrosis, unspecified                                                            | 3  |
| M31.0 | Other necrotizing vasculopathies: Hypersensitivity angiitis                                        | 1  |
| M35.0 | Other systemic involvement of connective tissue: Sicca syndrome [Sjögren]                          | 1  |

|       |                                                                                                                                                                  |    |
|-------|------------------------------------------------------------------------------------------------------------------------------------------------------------------|----|
| M35.3 | Other systemic involvement of connective tissue: Polymyalgia rheumatica                                                                                          | 1  |
| M48.0 | Other spondylopathies: Spinal stenosis                                                                                                                           | 2  |
| M81.9 | Osteoporosis without pathological fracture: Osteoporosis, unspecified                                                                                            | 3  |
| M86.9 | Osteomyelitis: Osteomyelitis, unspecified                                                                                                                        | 4  |
| M89.8 | Other disorders of bone: Other specified disorders of bone                                                                                                       | 2  |
| N03.9 | Chronic nephritic syndrome: Unspecified                                                                                                                          | 3  |
| N04.  | Nephrotic syndrome                                                                                                                                               | 1  |
| N17.  | Acute renal failure                                                                                                                                              | 1  |
| N17.9 | Acute renal failure: Acute renal failure, unspecified                                                                                                            | 20 |
| N18.0 | Chronic renal failure: End-stage renal disease                                                                                                                   | 12 |
| N18.9 | Chronic renal failure: Chronic renal failure, unspecified                                                                                                        | 9  |
| N19.  | Unspecified renal failure                                                                                                                                        | 24 |
| N28.8 | Other disorders of kidney and ureter, not elsewhere classified: Other specified disorders of kidney and ureter                                                   | 2  |
| N28.9 | Other disorders of kidney and ureter, not elsewhere classified: Disorder of kidney and ureter, unspecified                                                       | 1  |
| N39.0 | Other disorders of urinary system: Urinary tract infection, site not specified                                                                                   | 10 |
| R04.8 | Hemorrhage from respiratory passages: Hemorrhage from other sites in respiratory passages                                                                        | 1  |
| R06.0 | Abnormalities of breathing: Dyspnea                                                                                                                              | 2  |
| R09.0 | Other symptoms and signs involving the circulatory and respiratory systems: Asphyxia                                                                             | 1  |
| R09.2 | Other symptoms and signs involving the circulatory and respiratory systems: Respiratory arrest                                                                   | 9  |
| R09.8 | Other symptoms and signs involving the circulatory and respiratory systems: Other specified symptoms and signs involving the circulatory and respiratory systems | 1  |
| R13.  | Dysphagia                                                                                                                                                        | 3  |
| R16.0 | Hepatomegaly and splenomegaly, not elsewhere classified: Hepatomegaly, not elsewhere classified                                                                  | 1  |
| R31.  | Unspecified hematuria                                                                                                                                            | 1  |
| R53.  | Malaise and fatigue                                                                                                                                              | 3  |
| R54.  | Senility                                                                                                                                                         | 4  |
| R57.0 | Shock, not elsewhere classified: Cardiogenic shock                                                                                                               | 3  |
| R57.9 | Shock, not elsewhere classified: Shock, unspecified                                                                                                              | 3  |
| R62.8 | Lack of expected normal physiological development: Other lack of expected normal physiological development                                                       | 8  |
| R63.4 | Symptoms and signs concerning food and fluid intake: Abnormal weight loss                                                                                        | 2  |

|       |                                                                                                                |   |
|-------|----------------------------------------------------------------------------------------------------------------|---|
| R63.8 | Symptoms and signs concerning food and fluid intake: Other symptoms and signs concerning food and fluid intake | 1 |
| R64.  | Cachexia                                                                                                       | 1 |
| R68.8 | Other general symptoms and signs: Other specified general symptoms and signs                                   | 4 |
| R91.  | Abnormal findings on diagnostic imaging of lung                                                                | 1 |
| R96.0 | Other sudden death, cause unknown: Instantaneous death                                                         | 1 |
| R99.  | Other ill-defined and unspecified causes of mortality                                                          | 3 |

**Table S2. Numbers of ICD-9 Codes Mentioned in Any Hospitalization That Had Any ICD Qualifying for ChrIRD Hospitalization. There Were 159 Unique Codes, Among Which Were 2392 Code Occurrences Across 983 Hospitalizations.**

| ICD 9 code | Rubric                                                                                        | Number of code occurrences |
|------------|-----------------------------------------------------------------------------------------------|----------------------------|
| 7.4        | Cryptosporidiosis                                                                             | 1                          |
| 8          | Intestinal infection due to e. Coli, unspecified                                              | 1                          |
| 8.45       | Intestinal infection due to clostridium difficile                                             | 38                         |
| 8.46       | Intestinal infection due to other anaerobes                                                   | 2                          |
| 9          | Infectious colitis, enteritis, and gastroenteritis                                            | 3                          |
| 9.1        | Colitis, enteritis, and gastroenteritis of presumed infectious origin                         | 1                          |
| 11.9       | Unspecified pulmonary tuberculosis                                                            | 1                          |
| 11.9       | Unspecified pulmonary tuberculosis, confirmation unspecified                                  | 1                          |
| 30.9       | Leprosy, unspecified                                                                          | 1                          |
| 38         | Streptococcal septicemia                                                                      | 14                         |
| 38.1       | Staphylococcal septicemia, unspecified                                                        | 4                          |
| 38.11      | Methicillin susceptible staphylococcus aureus septicemia                                      | 12                         |
| 38.12      | Methicillin resistant staphylococcus aureus septicemia                                        | 7                          |
| 38.19      | Other staphylococcal septicemia                                                               | 4                          |
| 38.2       | Pneumococcal septicemia                                                                       | 2                          |
| 38.3       | Septicemia due to anaerobes                                                                   | 4                          |
| 38.4       | Septicemia due to gram-negative organism, unspecified                                         | 3                          |
| 38.42      | Septicemia due to escherichia coli (e. Coli)                                                  | 15                         |
| 38.43      | Septicemia due to pseudomonas                                                                 | 3                          |
| 38.49      | Other septicemia due to gram-negative organisms                                               | 11                         |
| 38.8       | Other specified septicemias                                                                   | 6                          |
| 38.9       | Unspecified septicemia                                                                        | 128                        |
| 39.1       | Pulmonary actinomycotic infection                                                             | 1                          |
| 70.2       | Viral hepatitis b with hepatic coma, acute or unspecified, without mention of hepatitis delta | 1                          |
| 70.6       | Unspecified viral hepatitis with hepatic coma                                                 | 1                          |
| 70.7       | Unspecified viral hepatitis c                                                                 | 1                          |
| 70.7       | Unspecified viral hepatitis c without hepatic coma                                            | 18                         |
| 70.71      | Unspecified viral hepatitis c with hepatic coma                                               | 1                          |
| 242        | Toxic diffuse goiter without mention of thyrotoxic crisis or storm                            | 10                         |
| 242.1      | Toxic uninodular goiter without mention of thyrotoxic crisis or storm                         | 1                          |
| 242.3      | Toxic nodular goiter, unspecified type                                                        | 2                          |
| 242.4      | Thyrotoxicosis from ectopic thyroid nodule                                                    | 1                          |
| 242.8      | Thyrotoxicosis of other specified origin without mention of thyrotoxic crisis or storm        | 2                          |
| 242.9      | Thyrotoxicosis without mention of goiter or other cause                                       | 1                          |

|                                                                            |     |
|----------------------------------------------------------------------------|-----|
| Thyrotoxicosis without mention of goiter or other cause, and without       |     |
| 242.9 mention of thyrotoxic crisis or storm                                | 20  |
| 245.2 Chronic lymphocytic thyroiditis                                      | 1   |
| 245.8 Other and unspecified chronic thyroiditis                            | 2   |
| 253 Acromegaly and gigantism                                               | 2   |
| 253.2 Panhypopituitarism                                                   | 1   |
| 287.39 Other primary thrombocytopenia                                      | 1   |
| 289.83 Myelofibrosis                                                       | 1   |
| 320.2 Streptococcal meningitis                                             | 1   |
| 320.3 Staphylococcal meningitis                                            | 1   |
| 320.82 Meningitis due to gram-negative bacteria, not elsewhere classified  | 1   |
| 320.9 Meningitis due to unspecified bacterium                              | 1   |
| 321 Cryptococcal meningitis                                                | 5   |
| 322.9 Meningitis, unspecified                                              | 1   |
| 324 Intracranial abscess                                                   | 1   |
| 480.2 Pneumonia due to parainfluenza virus                                 | 1   |
| 482 Pneumonia due to klebsiella pneumoniae                                 | 3   |
| 482.1 Pneumonia due to pseudomonas                                         | 12  |
| 482.2 Pneumonia due to hemophilus influenzae (h. Influenzae)               | 2   |
| 482.3 Pneumonia due to streptococcus, unspecified                          | 4   |
| 482.39 Pneumonia due to other streptococcus                                | 2   |
| 482.4 Pneumonia due to staphylococcus, unspecified                         | 4   |
| 482.41 Methicillin susceptible pneumonia due to staphylococcus aureus      | 10  |
| 482.42 Methicillin resistant pneumonia due to staphylococcus aureus        | 5   |
| 482.81 Pneumonia due to anaerobes                                          | 1   |
| 482.82 Pneumonia due to escherichia coli [e.coli]                          | 5   |
| 482.83 Pneumonia due to other gram-negative bacteria                       | 5   |
| 482.84 Pneumonia due to legionnaires' disease                              | 4   |
| 482.9 Bacterial pneumonia, unspecified                                     | 8   |
| 483 Pneumonia due to mycoplasma pneumoniae                                 | 1   |
| 483.8 Pneumonia due to other specified organism                            | 1   |
| 484.1 Pneumonia in cytomegalic inclusion disease                           | 1   |
| 485 Bronchopneumonia, organism unspecified                                 | 3   |
| 486 Pneumonia, organism unspecified                                        | 341 |
| 502 Pneumoconiosis due to other silica or silicates                        | 2   |
| 510 Empyema with fistula                                                   | 2   |
| 510.9 Empyema without mention of fistula                                   | 11  |
| 511.81 Malignant pleural effusion                                          | 6   |
| 518.81 Acute respiratory failure                                           | 164 |
| 518.84 Acute and chronic respiratory failure                               | 21  |
| 530.21 Ulcer of esophagus with bleeding                                    | 3   |
| 531 Acute gastric ulcer with hemorrhage, without mention of obstruction    | 6   |
| 531.1 Acute gastric ulcer with perforation, without mention of obstruction | 1   |



|        |                                                                                                                         |    |
|--------|-------------------------------------------------------------------------------------------------------------------------|----|
| 531.4  | Chronic or unspecified gastric ulcer with hemorrhage, without mention of obstruction                                    | 29 |
| 531.41 | Chronic or unspecified gastric ulcer with hemorrhage, with obstruction                                                  | 1  |
| 531.5  | Chronic or unspecified gastric ulcer with perforation, without mention of obstruction                                   | 3  |
| 532    | Acute duodenal ulcer with hemorrhage, without mention of obstruction                                                    | 5  |
| 532.1  | Acute duodenal ulcer with perforation, without mention of obstruction                                                   | 1  |
| 532.4  | Chronic or unspecified duodenal ulcer with hemorrhage, without mention of obstruction                                   | 14 |
| 532.5  | Chronic or unspecified duodenal ulcer with perforation, without mention of obstruction                                  | 3  |
| 532.7  | Chronic duodenal ulcer without mention of hemorrhage or perforation, without mention of obstruction                     | 1  |
| 533.4  | Chronic or unspecified peptic ulcer of unspecified site with hemorrhage, without mention of obstruction                 | 1  |
| 533.6  | Chronic or unspecified peptic ulcer of unspecified site with hemorrhage and perforation, without mention of obstruction | 2  |
| 534.4  | Chronic or unspecified gastrojejunal ulcer with hemorrhage, without mention of obstruction                              | 1  |
| 535.01 | Acute gastritis with hemorrhage                                                                                         | 1  |
| 535.11 | Atrophic gastritis with hemorrhage                                                                                      | 2  |
| 535.41 | Other specified gastritis with hemorrhage                                                                               | 3  |
| 535.51 | Unspecified gastritis and gastroduodenitis with hemorrhage                                                              | 4  |
| 536.1  | Acute dilatation of stomach                                                                                             | 2  |
| 536.41 | Infection of gastrostomy                                                                                                | 2  |
| 540    | Acute appendicitis with generalized peritonitis                                                                         | 10 |
| 540.1  | Acute appendicitis with peritoneal abscess                                                                              | 2  |
| 556.6  | Universal ulcerative (chronic) colitis                                                                                  | 3  |
| 558.41 | Eosinophilic gastroenteritis                                                                                            | 1  |
| 562.02 | Diverticulosis of small intestine with hemorrhage                                                                       | 1  |
| 562.13 | Diverticulitis of colon with hemorrhage                                                                                 | 11 |
| 567.23 | Spontaneous bacterial peritonitis                                                                                       | 3  |
| 567.29 | Other suppurative peritonitis                                                                                           | 1  |
| 569.5  | Abscess of intestine                                                                                                    | 9  |
| 569.83 | Perforation of intestine                                                                                                | 9  |
| 570    | Acute and subacute necrosis of liver                                                                                    | 17 |
| 571.42 | Autoimmune hepatitis                                                                                                    | 1  |
| 572    | Abscess of liver                                                                                                        | 8  |
| 574.7  | Calculus of gallbladder and bile duct with other cholecystitis, without mention of obstruction                          | 1  |
| 577    | Acute pancreatitis                                                                                                      | 39 |
| 577.1  | Chronic pancreatitis                                                                                                    | 15 |
| 580.9  | Acute glomerulonephritis with unspecified pathological lesion in kidney                                                 | 3  |

|        |                                                                                                |     |
|--------|------------------------------------------------------------------------------------------------|-----|
|        | Nephritis and nephropathy, not specified as acute or chronic, in diseases classified elsewhere | 44  |
| 583.81 |                                                                                                |     |
| 584    | Acute renal failure                                                                            | 2   |
| 584.5  | Acute kidney failure with lesion of tubular necrosis                                           | 42  |
| 584.8  | Acute kidney failure with other specified pathological lesion in kidney                        | 6   |
| 584.9  | Acute kidney failure, unspecified                                                              | 343 |
| 585.6  | End stage renal disease                                                                        | 83  |
| 590    | Chronic pyelonephritis without lesion of renal medullary necrosis                              | 1   |
| 590.1  | Acute pyelonephritis                                                                           | 1   |
| 590.1  | Acute pyelonephritis without lesion of renal medullary necrosis                                | 12  |
| 590.2  | Renal and perinephric abscess                                                                  | 2   |
| 595.1  | Chronic interstitial cystitis                                                                  | 1   |
| 682.1  | Cellulitis and abscess of neck                                                                 | 1   |
| 695.13 | Stevens-johnson syndrome                                                                       | 1   |
| 695.4  | Lupus erythematosus                                                                            | 2   |
| 696    | Psoriatic arthropathy                                                                          | 2   |
| 696.1  | Other psoriasis and similar disorders                                                          | 19  |
| 707.23 | Pressure ulcer, stage iii                                                                      | 5   |
| 710    | Diffuse diseases of connective tissue                                                          | 1   |
| 710    | Systemic lupus erythematosus                                                                   | 22  |
| 710.3  | Dermatomyositis                                                                                | 1   |
| 710.4  | Polymyositis                                                                                   | 2   |
| 711    | Pyogenic arthritis                                                                             | 1   |
| 711.06 | Pyogenic arthritis involving lower leg                                                         | 8   |
| 711.07 | Pyogenic arthritis involving ankle and foot                                                    | 1   |
| 714    | Rheumatoid arthritis                                                                           | 136 |
| 714.1  | Felty's syndrome                                                                               | 1   |
| 725    | Polymyalgia rheumatica                                                                         | 17  |
| 728    | Infective myositis                                                                             | 1   |
| 728.88 | Rhabdomyolysis                                                                                 | 22  |
| 730    | Acute osteomyelitis, site unspecified                                                          | 1   |
| 730.07 | Acute osteomyelitis involving ankle and foot                                                   | 7   |
| 730.1  | Chronic osteomyelitis, site unspecified                                                        | 1   |
| 730.15 | Chronic osteomyelitis involving pelvic region and thigh                                        | 1   |
| 730.17 | Chronic osteomyelitis involving ankle and foot                                                 | 2   |
| 730.2  | Unspecified osteomyelitis, site unspecified                                                    | 2   |
| 730.21 | Unspecified osteomyelitis involving shoulder region                                            | 3   |
| 730.23 | Unspecified osteomyelitis involving forearm                                                    | 1   |
| 730.26 | Unspecified osteomyelitis involving lower leg                                                  | 1   |
| 730.27 | Unspecified osteomyelitis involving ankle and foot                                             | 12  |
| 730.28 | Unspecified osteomyelitis involving other specified sites                                      | 7   |
| 780.01 | Coma                                                                                           | 9   |
| 780.2  | Syncope and collapse                                                                           | 213 |

|        |                          |    |
|--------|--------------------------|----|
| 780.3  | Convulsions              | 1  |
| 780.39 | Other convulsions        | 87 |
| 780.71 | Chronic fatigue syndrome | 2  |
| 785.51 | Cardiogenic shock        | 24 |
| 785.52 | Septic shock             | 56 |
| 786.03 | Apnea                    | 1  |
| 789.51 | Malignant ascites        | 2  |

**Table S3. Non-lipid, Non-lipoprotein Predictors of ChrIRD (non CVD, non-cancer chronic inflammatory-related Hospitalization and Death) in Poisson regression up 10.1 Years**

|                     | Unit or category    | Relative risk | Lower limit | Upper limit | P for trend |
|---------------------|---------------------|---------------|-------------|-------------|-------------|
| Age                 | 10 Years            | 1.80          | 1.66        | 1.95        | <.0001      |
| Race/ethnicity      | White vs Hispanic   | 1.05          | 0.88        | 1.26        | 0.57        |
|                     | Chinese vs Hispanic | 0.76          | 0.58        | 0.98        | 0.04        |
|                     | Black vs Hispanic   | 0.97          | 0.81        | 1.18        | 0.78        |
| Sex                 | Female              | 0.74          | 0.61        | 0.89        | 0.002       |
| Height              | 10 cm               | 1.07          | 0.97        | 1.18        | 0.17        |
| Heart rate          | 10 beats/min        | 1.11          | 1.04        | 1.18        | 0.002       |
| Systolic BP         | 20 mmHg             | 1.15          | 1.06        | 1.25        | 0.001       |
| Diastolic BP        | 10 mmHg             | 0.94          | 0.86        | 1.03        | 0.21        |
| Antihypertensive Rx | Non user vs user    | 0.86          | 0.75        | 0.98        | 0.03        |
| BMI                 | 5 kg/m <sup>2</sup> | 1.07          | 1.00        | 1.14        | 0.04        |
| Smoking             | Former vs Never     | 1.09          | 0.95        | 1.25        | 0.22        |
|                     | Current vs Never    | 1.65          | 1.37        | 2.00        | <.0001      |
| Diabetes            | No vs Yes           | 0.76          | 0.64        | 0.90        | 0.001       |
| IL- 6               | 1.22 pg/mL          | 1.17          | 1.11        | 1.23        | <.0001      |
| hsCrp               | 5.2 mg/L            | 1.03          | 0.96        | 1.10        | 0.4334      |
| D-Dimer             | 0.77 µg/mL          | 1.08          | 1.04        | 1.11        | <.0001      |

**Table S4. Model Selection Among High Density Lipoprotein (HDL)-related Variables (HS-P, HM-P, HL-P, and HDL-C). HDL-related variables added to base model 1. Base model 1 includes with the set of covariates\*, but no lipid or lipoprotein variables. Values Are -2 log likelihood<sup>†</sup> for the Base Model and Changes from This for Other Models.**

|                                               | Added variables |              |                               |
|-----------------------------------------------|-----------------|--------------|-------------------------------|
|                                               | HL-P<br>HDL-C   | HS-P<br>HM-P | HS-P<br>HM-P<br>HL-P<br>HDL-C |
| Number of variables added                     | 2               | 2            | 4                             |
| Chi-square p=0.05 cutpoint                    | -5.99           | -5.99        | -9.49                         |
| Chronic inflammatory-related disease (ChrIRD) | -9.7            | -19.9        | -23.8                         |
| Any Cardiovascular Disease (CVD)              | -5.4            | -7.6         | -9.7                          |
| Coronary Heart Disease (CHD)                  | -8.8            | -10.3        | -14.6                         |
| Stroke                                        | -6.2            | -0.4         | -6.4                          |
| Heart Failure (HF)                            | -2.5            | -0.9         | -2.5                          |

\* The covariates and the variables in the LDL family are listed in the Methods section.

<sup>†</sup> Lower -2 log likelihood represents model improvement. The chi-square cutpoint for improvement which is statistically significant at the p = 0.05 level is given in each subtable.

**Table S5. Model Selection Among High Density Lipoprotein (HDL)-related Variables (HS-P, HM-P, HL-P, and HDL-C). HDL-related variables added to a base model. Base model 2 includes the set of covariates and 8 lipid and lipoprotein variables in the LDL family\*. Values Are -2 log likelihood<sup>†</sup> for the Base Model and Changes from This for Other Models.**

|                            | Added Variables |       |       |       |               |              |                               |
|----------------------------|-----------------|-------|-------|-------|---------------|--------------|-------------------------------|
|                            | HS-P            | HM-P  | HL-P  | HDL-C | HL-P<br>HDL-C | HS-P<br>HM-P | HS-P<br>HM-P<br>HL-P<br>HDL-C |
| Number of variables added  | 1               | 1     | 1     | 1     | 2             | 2            | 4                             |
| Chi-square p=0.05 cutpoint | -3.84           | -3.84 | -3.84 | -3.84 | -5.99         | -5.99        | -9.49                         |
| ChrIRD                     | -1.9            | -8.0  | -2.0  | 0.0   | -3.8          | -22.7        | -25.8                         |
| Any CVD                    | -0.1            | -3.6  | -0.1  | -2.1  | -3.5          | -6.7         | -7.2                          |
| CHD                        | -0.1            | -3.0  | -0.2  | -2.5  | -3.4          | -5.7         | -6.4                          |
| Stroke                     | -0.1            | 0.0   | -0.9  | -0.4  | -0.9          | -0.2         | -1.2                          |
| HF                         | 0.0             | -1.3  | 0.0   | -1.8  | -3.2          | -1.7         | -3.4                          |

\* The covariates and the variables in the LDL family are listed in the Methods section.

<sup>†</sup> Lower -2 log likelihood represents model improvement. The chi-square cutpoint for improvement which is statistically significant at the p = 0.05 level is given in each subtable.
